# Supplementary material
Source: HighWire-hosted journal article supplement (https://www.cmajopen.ca/highwire/filestream/80985/field_highwire_adjunct_files/0/open-2016-0126-1-at.pdf)
Supplement: open-2016-0126-1-at.pdf [file open-2016-0126-1-at.pdf]

## Appendix 1 (as supplied by the authors): Summary of public drug coverage available for persons not on social assistance in each province in 2014

|           | <b>Residents age 55 to 64</b>                                                                  | <b>Residents age 65 and older</b>                                          |
|-----------|------------------------------------------------------------------------------------------------|----------------------------------------------------------------------------|
| <b>BC</b> | Income-based, catastrophic drug coverage                                                       | Income-based, catastrophic drug coverage                                   |
| <b>AB</b> | Optional insurance-based coverage (with premiums and co-payments)                              | Full coverage (with co-payments)                                           |
| <b>SK</b> | Income-based, catastrophic drug coverage                                                       | Income-tested, full coverage (with co-payments)                            |
| <b>MB</b> | Income-based, catastrophic drug coverage                                                       | Income-based, catastrophic drug coverage                                   |
| <b>ON</b> | Income-based, catastrophic drug coverage                                                       | Full coverage (with co-payments)                                           |
| <b>QC</b> | Mandatory private insurance or insurance-based public coverage (with premiums and co-payments) | Mandatory, insurance-based public coverage (with premiums and co-payments) |
| <b>NB</b> | Optional insurance-based coverage (with premiums and co-payments)                              | Income-tested, full coverage (with co-payments)                            |
| <b>NS</b> | Optional insurance-based coverage (with premiums and co-payments)                              | Insurance-tested, full coverage (with co-payments)                         |
| <b>PE</b> | Income-based, catastrophic drug coverage                                                       | Full coverage (with co-payments)                                           |
| <b>NL</b> | Income-based, catastrophic drug coverage                                                       | Income-tested, full coverage (with co-payments)                            |

Notes: all provinces offer coverage for persons on social assistance. Income-based, catastrophic drug coverage programs require patients to finance drug costs below deductibles set as a percentage of household income (varying by province). Income-based, full coverage plans are plans offered only to households with incomes below specified levels. Insurance-based programs are programs that require patients to pay premiums as well as deductibles and/or co-payments. Insurance-tested programs are programs only available to households who have no private insurance coverage.

Source: Barnes S, Anderson L. "Low Earnings, Unfilled Prescriptions" Toronto: Wellesley Institute; July 2015.
